# Supplementary material for: The Social Backgrounds, Dharma Lineages, and Achievements of Women Chan Masters, 1572–1722
Source: MDPI journal article supplement (doi:10.3390/rel14101241), 2023-09-27
Supplement: s1 [file s1]

HUALIN  
International Journal  
of  
Buddhist Studies

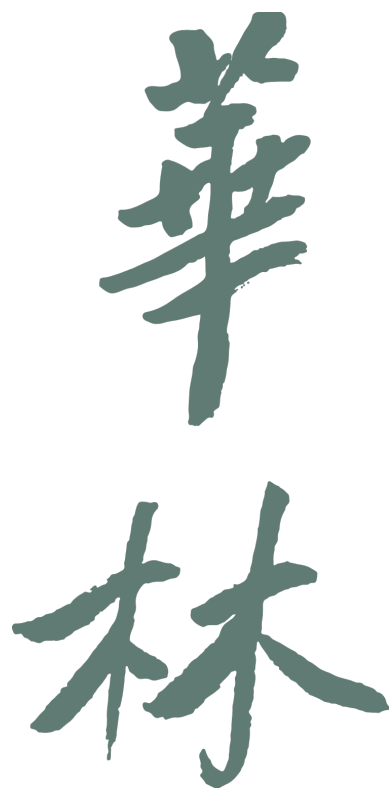

The University of British Columbia  
Vancouver Campus  
1871 West Mall, Vancouver BC  
V6T 1Z2 Canada

---

<https://dx.doi.org/10.15239/hijbs>  
[hualin.journal@ubc.ca](mailto:hualin.journal@ubc.ca)

---

ISSN (Print): 2576-2923  
ISSN (Online): 2576-2931

September 18, 2023

Professor YuhNeu Chen  
Cheng Kung University  
[c31192@mail.ncku.edu.tw](mailto:c31192@mail.ncku.edu.tw)

RE: republication of translated article

Dear Prof. YuhNeu Chen

On behalf of the Editorial Committee, we are pleased to grant you permission to publish an adapted English translation of the Chinese article 晚明清初女禪師的出身、法脈及其成就》 that you have published with the *Hualin International Journal of Buddhist Studies*.

The Chinese version is available at the following link:  
陳玉女《晚明清初女禪師的出身、法脈及其成就》，《華林國際佛學學刊》第五卷·第二期（2022）：233–292;  
[https://dx.doi.org/10.6939/HIJBS.202210\\_5\(2\).0008](https://dx.doi.org/10.6939/HIJBS.202210_5(2).0008)

Please feel free to let us know if you have any questions regarding this.

Kind regards,

Vicky Baker  
Coordinator, Hualin International Journal of Buddhist Studies  
Email: [Vicky.baker@ubc.ca](mailto:Vicky.baker@ubc.ca)  
Phone: +1 604-822-3188
